# Supplementary material for: A phylogenetic backbone for Bivalvia: an RNA-seq approach
Source: PubMed Central journal article supplement (PMC4308999; doi:10.1098/rspb.2014.2332), 2015-02-22

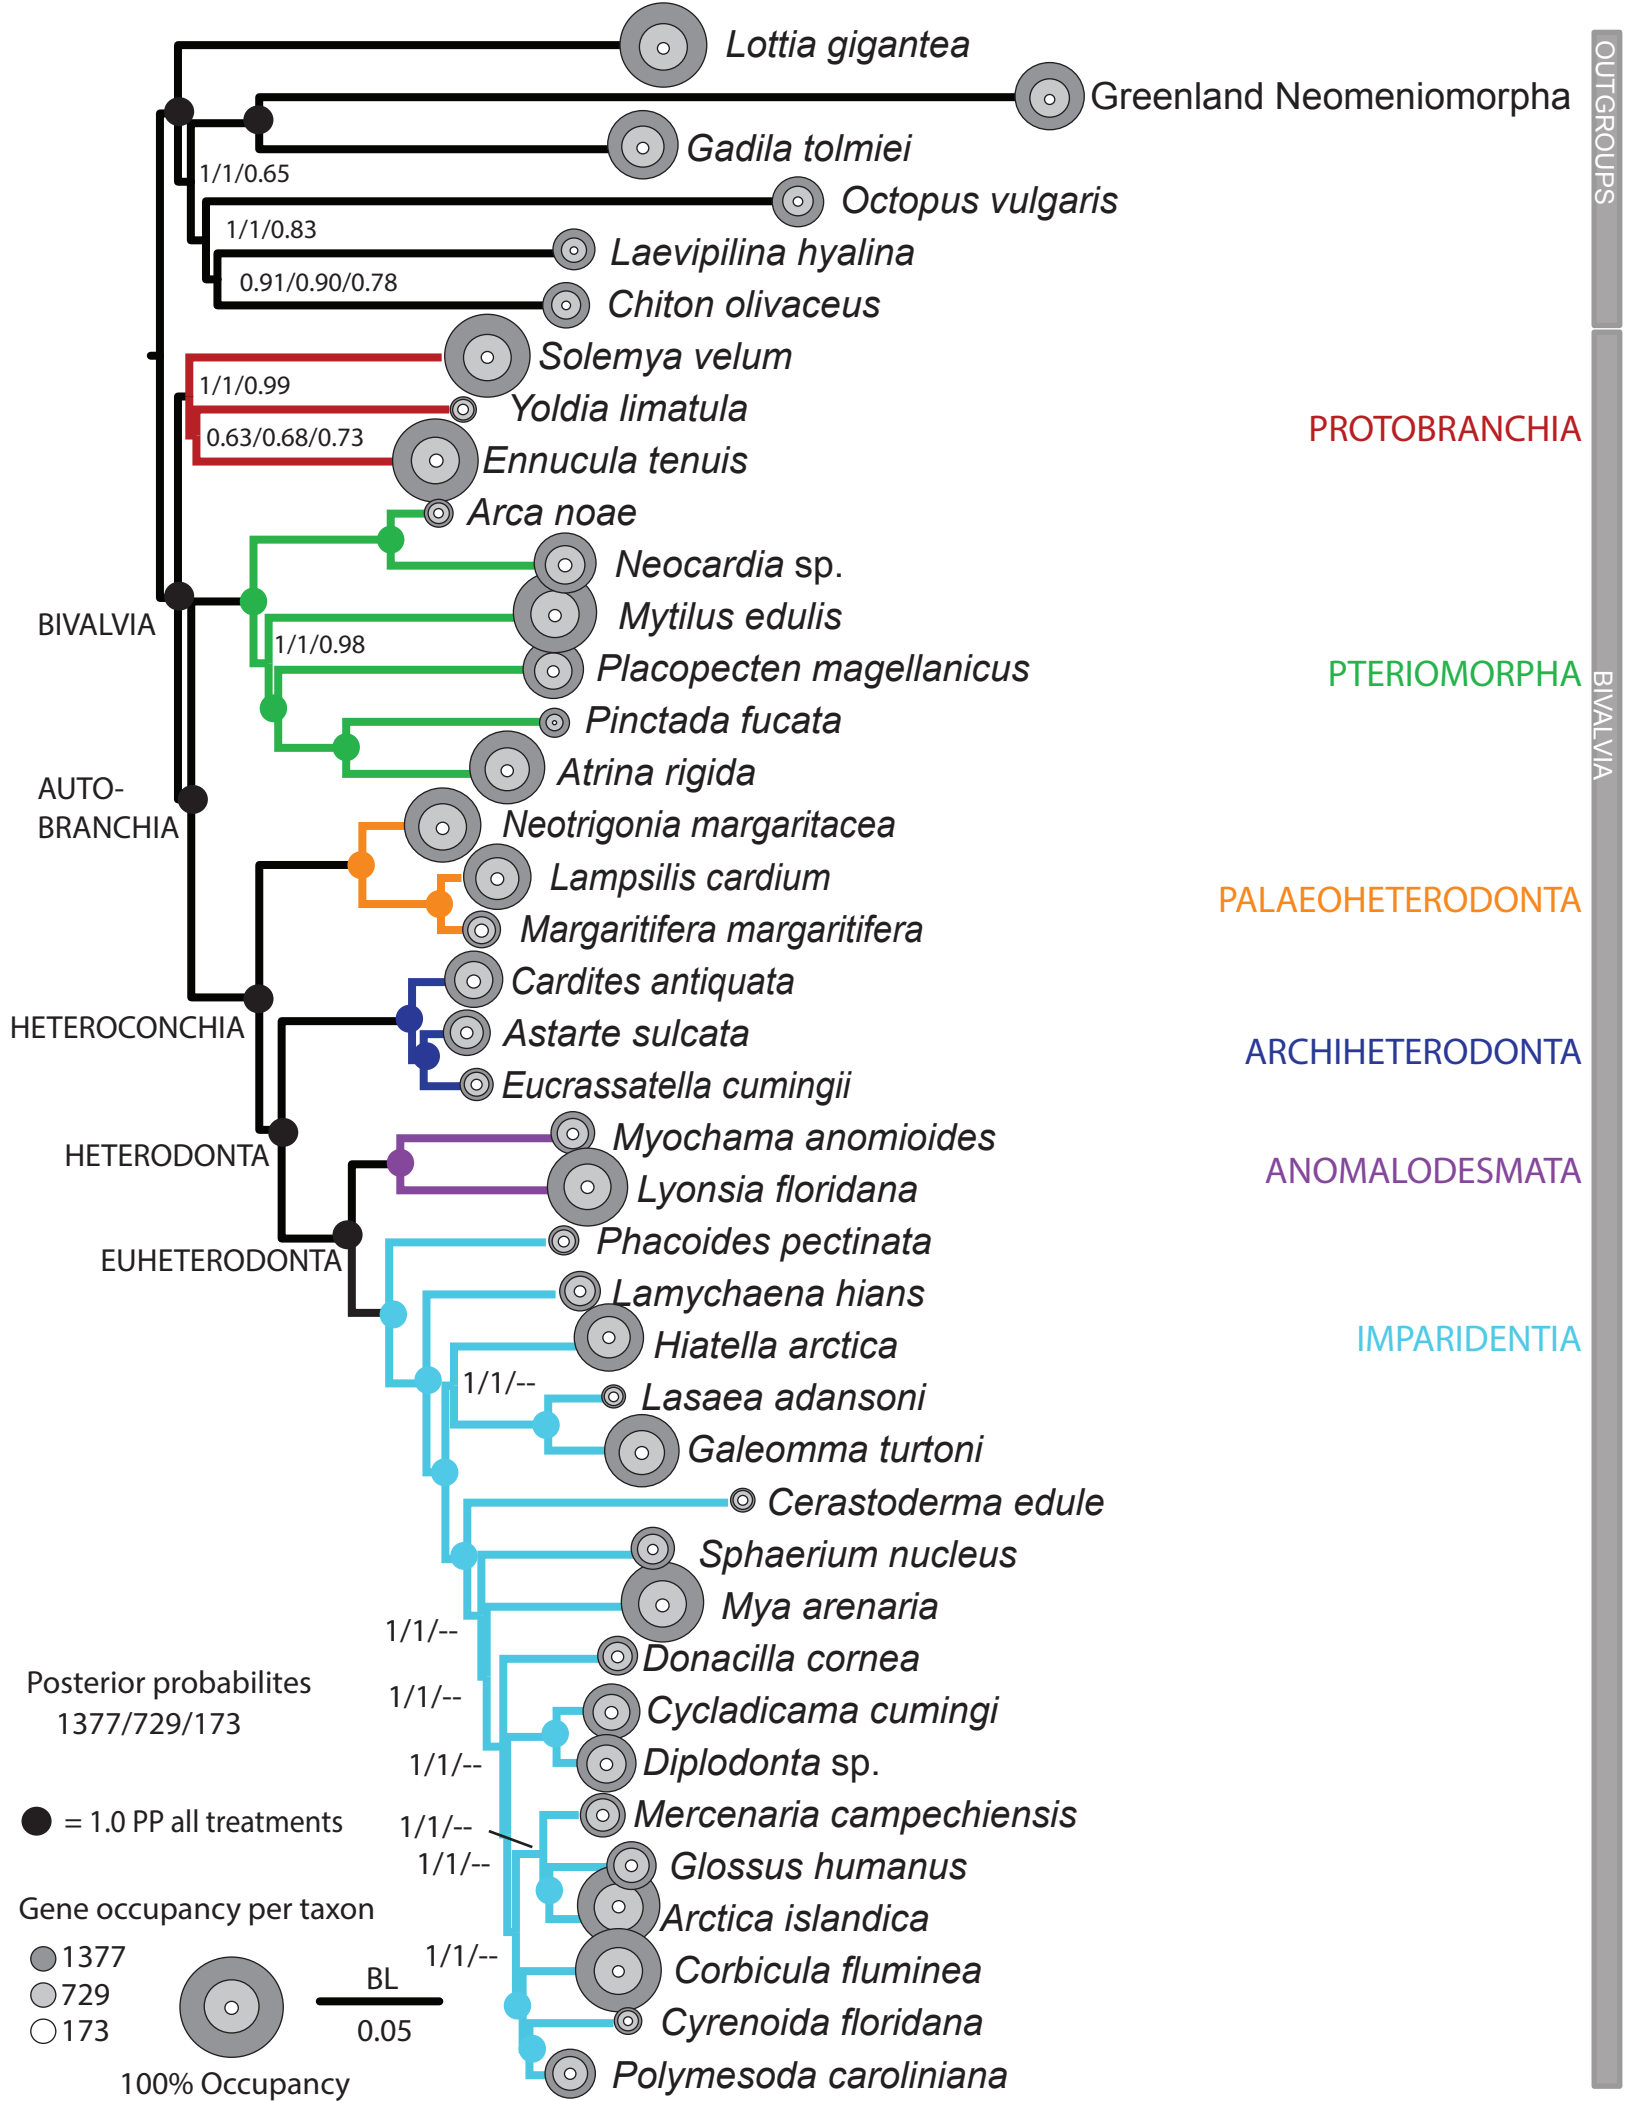

Supplement: rspb20142332supp1.pdf [file rspb20142332supp1.pdf]
